# Supplementary material for: Genetic variation at the microRNA binding site of CAV1 gene is associated with lung cancer susceptibility
Source: PubMed Central journal article supplement (PMC5696234; doi:10.18632/oncotarget.21687), 2017-10-09
Supplement: oncotarget-08-92943-s001.pdf [file oncotarget-08-92943-s001.pdf]

# Genetic variation at the microRNA binding site of CAV1 gene is associated with lung cancer susceptibility

## SUPPLEMENTARY MATERIALS

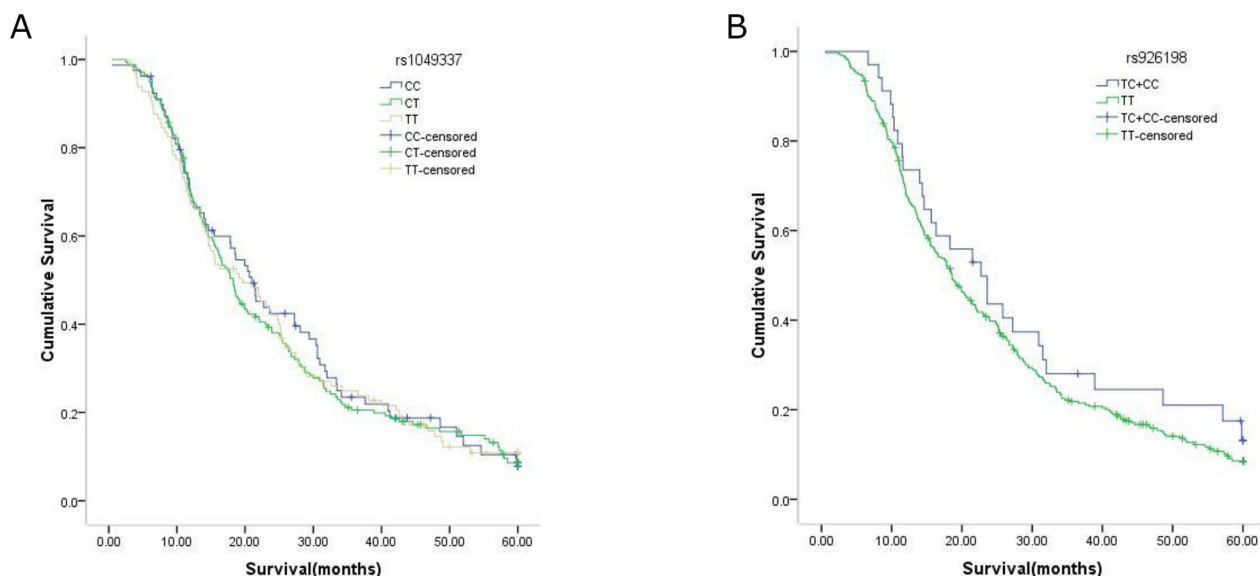

**Supplementary Figure 1: Genotypes of rs1049337, rs926198 and its association with NSCLC survival time. (A) Rs1049337. (B) rs926198.**

**Supplementary Table 1: Genetic polymorphisms and risk of lung cancer**

|                         | Genotype | Controls (%) | SCLC (%) | Adjusted OR <sup>a</sup> | 95% CI      | P     | Squamous cell carcinoma | Adjusted OR <sup>a</sup> | 95% CI      | P      |
|-------------------------|----------|--------------|----------|--------------------------|-------------|-------|-------------------------|--------------------------|-------------|--------|
| Rs1049337               | TT       | 118(25.9)    | 19(28.8) | Ref                      |             |       | 18(27.3)                | Ref                      |             |        |
|                         | TC       | 207(45.5)    | 33(50.0) | 0.992                    | 0.539,1.824 | 0.979 | 29(43.9)                | 0.916                    | 0.488,1.720 | 0.783  |
|                         | CC       | 130(28.6)    | 14(21.2) | 0.678                    | 0.325,1.416 | 0.301 | 19(28.8)                | 0.974                    | 0.487,1.947 | 0.940  |
| Dominant model          |          |              |          | 0.862                    | 0.486,1.529 | 0.611 |                         | 0.935                    | 0.523,1.672 | 0.820  |
| Recessive model         |          |              |          | 0.662                    | 0.354,1.239 | 0.197 |                         | 1.029                    | 0.581,1.824 | 0.921  |
| Additive model C allele |          |              |          | 0.809                    | 0.560,1.167 | 0.256 |                         | 0.986                    | 0.684,1.420 | 0.938  |
| Rs926198                | TT       | 385(84.6)    | 6(9.1)   | Ref                      |             |       | 1(1.5)                  | Ref                      |             |        |
|                         | TC+CC    | 70(15.4)     | 60(90.9) | 0.546                    | 0.227,1.313 | 0.176 | 65(98.5)                | 0.085                    | 0.012,0.625 | 0.015* |
| Additive mode C allele  |          |              |          | 0.559                    | 0.238,1.314 | 0.182 |                         | 0.091                    | 0.013,0.660 | 0.018* |

<sup>a</sup>Adjusted for age, ORs and 95% CIs were calculated by logistic regression. \* P<0.05.

**Supplementary Table 2: Distribution of genotypes and survival time of NSCLC**

| SNP             | Genotype | NSCLC (%) | MST (mon) | Log-rank <i>P</i> | Adjusted HR <sup>a</sup> | 95% CI      | Adenocarcinoma (%) | MST (mon) | Log-rank <i>P</i> | Adjusted HR <sup>a</sup> | 95% CI      |
|-----------------|----------|-----------|-----------|-------------------|--------------------------|-------------|--------------------|-----------|-------------------|--------------------------|-------------|
| Rs1049337       | TT       | 88(28.2)  | 23.2      |                   | Ref                      |             | 71(29.0)           | 24.2      |                   | Ref                      |             |
|                 | TC       | 153(49.0) | 22.7      | 0.811             | 1.015                    | 0.764,1.346 | 123(50.2)          | 22.9      | 0.827             | 1.076                    | 0.782,1.481 |
|                 | CC       | 71(22.8)  | 24.9      |                   | 0.921                    | 0.656,1.294 | 51(20.8)           | 25.4      |                   | 0.894                    | 0.656,1.445 |
| Dominant model  |          |           | 23.4      | 0.912             | 0.980                    | 0.751,1.278 |                    | 23.6      | 0.808             | 1.039                    | 0.769,1.404 |
| Recessive model |          |           | 22.8      | 0.526             | 0.911                    | 0.682,1.217 |                    | 23.3      | 0.655             | 0.924                    | 0.658,1.298 |
| Rs926198        | TT       | 283(90.7) | 22.9      |                   | Ref                      |             | 219(89.4)          | 23.1      |                   | Ref                      |             |
|                 | TC+CC    | 29(9.3)   | 27.5      | 0.217             | 0.761                    | 0.496,1.168 | 26(10.6)           | 28.7      | 0.185             | 0.732                    | 0.461,1.163 |

<sup>a</sup>Adjusted for age, HRs and 95% CIs were calculated by Cox regression.

**Supplementary Table 3: The results of microRNA predication**

| Database               | Prediction results                                                                                                                                     |
|------------------------|--------------------------------------------------------------------------------------------------------------------------------------------------------|
| MirSNP                 | has-miR-1285-3p, has-miR-3187-5p, has-miR-3609, has-miR-4311, has-miR-4708-5p, has-miR-5189, has-miR-520g, has-miR-520h, has-miR-548ah-5p, has-miR-612 |
| miRNASNP 1.0           | has-miR-4311                                                                                                                                           |
| PolymiRTS Database 3.0 | has-miR-6757-5p, has-miR-4311                                                                                                                          |
| SNPinfo web serve      | has-miR-1231, has-miR-1285, has-miR-518a-5p, has-miR-527, has-miR-612                                                                                  |
